# Supplementary material
Source: PubMed Central journal article supplement (PMC7305834)
Supplement: NIHMS1588823-supplement-Sfig1.pdf [file NIHMS1588823-supplement-Sfig1.pdf]

1 putative sites were predicted with these settings (80%) in sequence named **hg38\_refGene\_NR\_002819**

| Model ID | Model name | Score  | Relative score    | Start | End  | Strand | predicted site sequence |
|----------|------------|--------|-------------------|-------|------|--------|-------------------------|
| MA0112.2 | ESR1       | 14.677 | 0.836641411950213 | 1401  | 1420 | 1      | ctgcaaggtcagcctgagac    |

11 putative sites were predicted with these settings (80%) in sequence named **hg38\_refGene\_NR\_002819**

| Model ID | Model name | Score  | Relative score    | Start | End  | Strand | predicted site sequence |
|----------|------------|--------|-------------------|-------|------|--------|-------------------------|
| MA0258.2 | ESR2       | 5.494  | 0.802348330490692 | 201   | 215  | -1     | gagccactgtgccca         |
| MA0258.2 | ESR2       | 8.045  | 0.836048563338327 | 201   | 215  | 1      | tgggcacagtggctc         |
| MA0258.2 | ESR2       | 9.320  | 0.852892074463664 | 263   | 277  | 1      | aggtcaggagatcca         |
| MA0258.2 | ESR2       | 8.141  | 0.837316780646588 | 413   | 427  | -1     | ggctcaccgtaacct         |
| MA0258.2 | ESR2       | 8.558  | 0.842825599579345 | 413   | 427  | 1      | aggttacggtgagcc         |
| MA0258.2 | ESR2       | 11.006 | 0.875165140939992 | 809   | 823  | -1     | aggtcacctcgttc          |
| MA0258.2 | ESR2       | 6.485  | 0.815440032079092 | 1194  | 1208 | -1     | aggtaggatggcaa          |
| MA0258.2 | ESR2       | 8.745  | 0.845295981211061 | 1332  | 1346 | -1     | agggcacacaaagct         |
| MA0258.2 | ESR2       | 5.919  | 0.807962834199138 | 1406  | 1420 | -1     | gtctcaggctgacct         |
| MA0258.2 | ESR2       | 12.802 | 0.898891373082036 | 1406  | 1420 | 1      | aggtcagcctgagac         |
| MA0258.2 | ESR2       | 10.067 | 0.862760390393568 | 1450  | 1464 | -1     | atgtcaccaggtctt         |
