# Supplementary material
Source: PubMed Central journal article supplement (PMC7305834)

E-cadherin

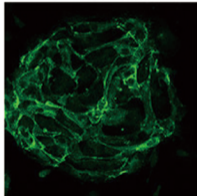

DAPI

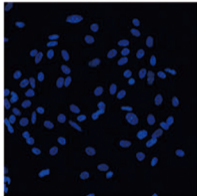

Merged

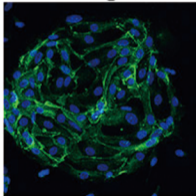

Vimentin

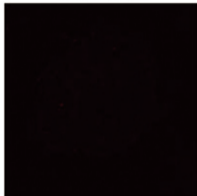

DAPI

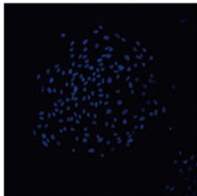

Merged

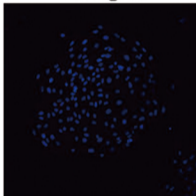

Supplement: NIHMS1588823-supplement-Sfig2.pdf [file NIHMS1588823-supplement-Sfig2.pdf]

EEC      CON      E<sub>2</sub>      E<sub>2</sub>+ICI      ICI

**Zeb1**

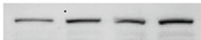

**Zeb2**

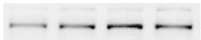

**E-cadherin**

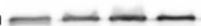

**Vimentin**

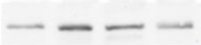

**GAPDH**

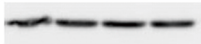

Supplement: NIHMS1588823-supplement-Sfig3.pdf [file NIHMS1588823-supplement-Sfig3.pdf]

**A**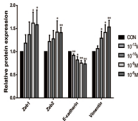**B**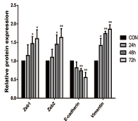**C**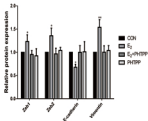**D**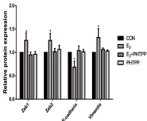

Supplement: NIHMS1588823-supplement-Sfig5.pdf [file NIHMS1588823-supplement-Sfig5.pdf]

**A**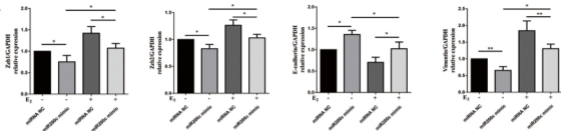**B**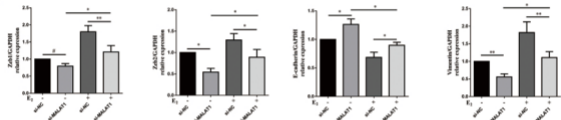**C**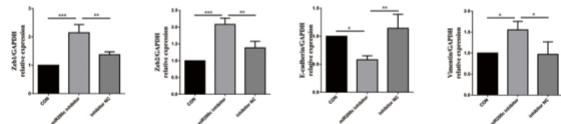**D**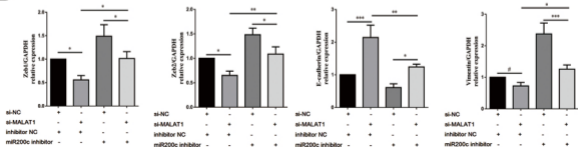

Supplement: NIHMS1588823-supplement-Sfig6.pdf [file NIHMS1588823-supplement-Sfig6.pdf]
